# Supplementary material
Source: HighWire-hosted journal article supplement (https://erj.ersjournals.com/content/58/1/2003862)
Supplement: inline-supplementary-material-1 [file inline-supplementary-material-1.pdf]

# Supplementary Information

## **A-to-I editing of miR-200b-3p in airway cells is associated with moderate-to-severe asthma**

Kevin M. Magnaye<sup>1,\*</sup>, Katherine A. Naughton<sup>1</sup>, Janel Huffman<sup>1</sup>, D. Kyle Hogarth<sup>2</sup>, Edward T. Naureckas<sup>2</sup>, Steven R. White<sup>2</sup>, Carole Ober<sup>1,\*</sup>

<sup>1</sup>Department of Human Genetics, University of Chicago, Chicago, IL 60637

<sup>2</sup>Department of Medicine, University of Chicago, Chicago, IL 60637

\*Corresponding Authors:

Department of Human Genetics

University of Chicago

Chicago, IL 60615

TEL: 773-834-0734

FAX: 773-834-0505

Email: [c-ober@genetics.uchicago.edu](mailto:c-ober@genetics.uchicago.edu)

[kmagnaye@uchicago.edu](mailto:kmagnaye@uchicago.edu)

## Methods

### **Genotyping and QC**

SNPs were genotyped using the Illumina Omni2.5-8v1A, Omni1MDuo, or Human Core arrays. SNPs on each array were excluded with  $HWE < 0.0001$  within each ethnic group (European American, African American),  $MAF < 0.05$ , SNP call rate  $< 0.95$ , and subject call rates  $< 0.95$ . Ancestry principal component analysis (PCA) was performed using 676 ancestral informative markers included on the arrays that overlap with the HapMap release 3.

### **Small RNA and total RNA extraction and sequencing**

RNAs were extracted from bronchial epithelial cells and purified using the QIAGEN AllPrep DNA/RNA/miRNA Universal Kit (Hilden, Germany), following manufacturer's instructions. Quality and quantity assessment of small RNA and total RNA were measured at the University of Chicago Functional Genomics Core using an Agilent RNA 6000 Pico assay and the Agilent 2100 Bioanalyzer. Small RNA-seq libraries were prepared using Illumina small RNA-SEQ library kits. cDNA libraries were constructed using the Illumina TruSeq RNA Library Prep Kit v2. Small RNA and RNA sequencing were performed at the University of Chicago Genomics Core on either the Illumina HiSeq 2500 or 4000 platforms.

### **Quality control of small and total RNA-seq**

For the small and total RNA-seq data, potential sample contamination and sample swaps were assessed using VerifyBamID (1). No cross-contamination was detected. For the RNA-seq data, two sample swaps between individuals were identified and corrected. Quality control checks were performed on the small RNA and total RNA-seq data using FastQC (2). Small RNA and total RNA sequences were then aligned and annotated to known miRNA and RNA sequences using miRge2.0 (3) and Spliced Transcripts Alignment to a Reference using STAR (4). miRNAs and genes with low count data ( $< 1$  CPM in at least 25% of the sample) and those on the X, Y, and mitochondrial chromosomes were removed. Samples containing  $> 2M$  mapped miRNA reads or  $> 8M$  mapped total RNA reads were kept, retaining 138 and 124 subjects for downstream analyses.

Raw miRNA and mRNA counts were normalized using quantile normalization and the trimmed mean of M-values (TMM) methods, respectively. Mean-variance trend of both datasets was adjusted using variance modeling in voom (5)). Technical sources of variation were identified using principal components analysis (PCA) for the global miRNA and total RNA expression profiles. For differential expression, surrogate variable analysis (6) was performed to predict latent covariates to include in the model. All covariates are described in the Methods of the main paper.

### **Detection of A-to-I edited sites**

The percentages of A-to-I editing were calculated for mapped miRNAs, using the A-to-I analysis module in miRge2.0 (3). Briefly, putative A-to-I edited signals were removed if: 1) they were located at miRNA SNPs with A/G differences; 2) they were in the 455 miRNAs located in repeat

elements; 3) they were in a lowly expressed miRNA (RPM < 1); or 4) their edited sequences aligned to  $\geq 1$  locations in the genome. For the retained reads that belonged to the canonical and edited miRNAs, all nucleotide positions in the canonical miRNA, except the terminal 5 bp were screened for A to G changes based on a binomial test considering the expected sequencing error rate (0.1%), as described (7). The A-to-I editing frequency (% A-to-I) was defined as the proportion of the mapped reads containing the edited nucleotide (G) relative to the total mapped reads at the given location.

### **Target gene prediction and pathway analysis**

Bioinformatic prediction of target genes was performed for the unedited and edited miR-200b-3p using TargetScanHuman5.2 and TargetScanHuman5.2 Custom, respectively (8). For the unedited miR-200b-3p, *in silico* target genes were identified using a search for the unedited “miR-200b-3p”. For the edited miR-200b-3p, *in silico* target genes were identified using a search for the seed sequence at positions 2-8 including the edited base, “AATGCTG”. Pathway analysis was performed using the TopFunn function within the ToppGene Suite for gene list enrichment analysis (9). Pathway enrichment analyses used a hypergeometric distribution with Bonferroni correction (p-value < 0.05). Venn diagrams of the genes and pathways of the unedited and edited forms of miR-200b-3p were generated using the VennDiagram package in R. Because TopFunn only reports the top 50 pathway enrichments, the unique pathways among the top 50 pathway enrichments of the unedited miR-200b-3p were used for comparison.

## Tables

**Table S1.** Nineteen A-to-I edited sites in bronchial epithelial cells from 138 subjects. The edited adenosine within the mature miRNA sequence is in bold.

| miRNA       | Position | Sequence<br>(seed sequence)                | Average<br>Mapped<br>Counts | Average<br>% A-to-I<br>Reads | # Subjects<br>with Edited<br>miRNA |
|-------------|----------|--------------------------------------------|-----------------------------|------------------------------|------------------------------------|
| miR-200b-3p | 5        | TA <b>A</b> TA <b>T</b> ACTGCCTGGTAATGATGA | 75358                       | 0.52                         | 135                                |
| miR-191-5p  | 3        | CA <b>A</b> CGGAATCCCAAAGCAGCTG            | 58512                       | 0.17                         | 27                                 |
| miR-200b-3p | 3        | TA <b>A</b> TA <b>T</b> ACTGCCTGGTAATGATGA | 91380                       | 0.15                         | 22                                 |
| miR-186-5p  | 3        | CA <b>A</b> AGAATTCTCCTTTTGGGCT            | 24646                       | 0.18                         | 13                                 |
| miR-148a-3p | 3        | TC <b>A</b> GTGCACTACAGAACTTTGT            | 154711                      | 0.14                         | 6                                  |
| miR-411-5p  | 5        | TA <b>G</b> TA <b>G</b> ACCGTATAGCGTACG    | 372                         | 5.40                         | 5                                  |
| miR-497-5p  | 2        | C <b>A</b> GCAGCACACTGTGGTTTGT             | 355                         | 5.21                         | 5                                  |
| miR-421     | 14       | ATCAACAGACATTAATTGGGCGC                    | 663                         | 0.89                         | 5                                  |
| miR-21-3p   | 3        | CAACACCA <b>G</b> TCGATGGGCTGT             | 22650                       | 0.21                         | 4                                  |
| miR-376c-3p | 6        | AACATAGAGGAAATTCACGT                       | 27                          | 34.09                        | 3                                  |
| miR-381-3p  | 4        | TATACAAGGGCAAGCTCTCTGT                     | 254                         | 3.09                         | 3                                  |
| miR-200a-3p | 3        | TA <b>A</b> CACTGTCTGGTAACGATGT            | 24079                       | 0.19                         | 2                                  |
| miR-339-3p  | 15       | TGAGCGCCTCGACGACAGAGCCG                    | 822                         | 9.62                         | 2                                  |
| miR-451a    | 3        | AA <b>A</b> CCGTTACCATTACTGAGTT            | 36137                       | 0.16                         | 2                                  |
| miR-191-5p  | 8        | CA <b>A</b> CGGAATCCCAAAGCAGCTG            | 56489                       | 0.15                         | 1                                  |
| miR-20a-5p  | 4        | T <b>A</b> AA <b>G</b> TGCTTATAGTGCAGGTAG  | 81                          | 3.7                          | 1                                  |
| miR-561-5p  | 13       | ATCAAGGATCTTAAACTTTGCC                     | 225                         | 2.22                         | 1                                  |
| miR-589-3p  | 6        | TCAGAA <b>C</b> AAATGCCGTTCCAGAG           | 14                          | 21.43                        | 1                                  |
| miR-664a-5p | 8        | ACTGGCTA <b>G</b> GGGAAAATGATTGGAT         | 153                         | 3.92                         | 1                                  |

**Table S2.** Top 50 pathway enrichments for the gene targets of unedited miR-200b-3p. Only the 604 gene targets of unedited miR-200b-3p that were expressed in BECs (CPM > 1) were included as input for pathway analysis, as implemented in TopFunn. Thirty-nine unique pathways are listed.

| ID      | Name                                                                      | Database                                    | Bonferroni Adjusted P-value | Number of genes from input | Number of genes in annotation |
|---------|---------------------------------------------------------------------------|---------------------------------------------|-----------------------------|----------------------------|-------------------------------|
| M16763  | Neurotrophin signaling pathway                                            | MSigDB C2<br>BIOCARTA (v7.1)                | 1.53E-11                    | 27                         | 126                           |
| M186    | PDGFR-beta signaling pathway                                              | MSigDB C2<br>BIOCARTA (v7.1)                | 2.30E-10                    | 26                         | 129                           |
| 101143  | Neurotrophin signaling pathway                                            | BioSystems:<br>KEGG                         | 2.06E-09                    | 24                         | 119                           |
| M48     | Signaling events mediated by Hepatocyte Growth Factor Receptor (c-Met)    | MSigDB C2<br>BIOCARTA (v7.1)                | 1.89E-08                    | 19                         | 79                            |
| 137930  | Signaling events mediated by Hepatocyte Growth Factor Receptor (c-Met)    | BioSystems:<br>Pathway Interaction Database | 3.30E-07                    | 17                         | 72                            |
| M295    | Genes related to PIP3 signaling in cardiac myocytes                       | MSigDB C2<br>BIOCARTA (v7.1)                | 8.95E-06                    | 15                         | 67                            |
| 1269443 | Signalling by NGF                                                         | BioSystems:<br>REACTOME                     | 9.03E-06                    | 43                         | 483                           |
| M281    | Signaling events mediated by focal adhesion kinase                        | MSigDB C2<br>BIOCARTA (v7.1)                | 1.32E-05                    | 14                         | 59                            |
| 1457794 | Signaling by MET                                                          | BioSystems:<br>REACTOME                     | 1.38E-05                    | 15                         | 69                            |
| M121    | mTOR signaling pathway                                                    | MSigDB C2<br>BIOCARTA (v7.1)                | 1.38E-05                    | 15                         | 69                            |
| 1269380 | Signaling by EGFR                                                         | BioSystems:<br>REACTOME                     | 1.46E-05                    | 36                         | 367                           |
| M2404   | Mechanism of Gene Regulation by Peroxisome Proliferators via PPARa(alpha) | MSigDB C2<br>BIOCARTA (v7.1)                | 2.35E-05                    | 13                         | 52                            |
| 169348  | Signaling events mediated by focal adhesion kinase                        | BioSystems:<br>Pathway Interaction Database | 3.86E-05                    | 13                         | 54                            |

|                |                                                            |                                                   |          |    |      |
|----------------|------------------------------------------------------------|---------------------------------------------------|----------|----|------|
| 83107          | Renal cell carcinoma                                       | BioSystems:<br>KEGG                               | 5.05E-05 | 14 | 65   |
| 1269654        | Transcriptional<br>Regulation by TP53                      | BioSystems:<br>REACTOME                           | 7.93E-05 | 35 | 374  |
| 1269507        | Signaling by Rho<br>GTPases                                | BioSystems:<br>REACTOME                           | 9.33E-05 | 38 | 430  |
| M13266         | Renal cell carcinoma                                       | MSigDB C2<br>BIOCARTA (v7.1)                      | 1.38E-04 | 14 | 70   |
| M164           | ErbB1 downstream<br>signaling                              | MSigDB C2<br>BIOCARTA (v7.1)                      | 1.45E-04 | 17 | 105  |
| M187           | Neurotrophic factor-<br>mediated Trk receptor<br>signaling | MSigDB C2<br>BIOCARTA (v7.1)                      | 1.85E-04 | 13 | 61   |
| 138001         | mTOR signaling<br>pathway                                  | BioSystems:<br>Pathway<br>Interaction<br>Database | 1.85E-04 | 13 | 61   |
| 1270302        | Developmental Biology                                      | BioSystems:<br>REACTOME                           | 2.22E-04 | 69 | 1081 |
| 1269460        | NGF signalling via<br>TRKA from the plasma<br>membrane     | BioSystems:<br>REACTOME                           | 2.25E-04 | 35 | 390  |
| 1404799        | Endocrine resistance                                       | BioSystems:<br>KEGG                               | 2.34E-04 | 16 | 96   |
| 1270303        | Axon guidance                                              | BioSystems:<br>REACTOME                           | 4.81E-04 | 43 | 554  |
| 138057         | ErbB1 downstream<br>signaling                              | BioSystems:<br>Pathway<br>Interaction<br>Database | 5.57E-04 | 16 | 102  |
| 694606         | Hepatitis B                                                | BioSystems:<br>KEGG                               | 7.02E-04 | 19 | 144  |
| 1269479        | Downstream signal<br>transduction                          | BioSystems:<br>REACTOME                           | 7.36E-04 | 32 | 355  |
| 1269478        | Signaling by PDGF                                          | BioSystems:<br>REACTOME                           | 1.06E-03 | 33 | 379  |
| PW:000057<br>8 | scatter factor/hepatocyte<br>growth factor signaling       | Pathway Ontology                                  | 1.22E-03 | 6  | 11   |
| M195           | C-MYB transcription<br>factor network                      | MSigDB C2<br>BIOCARTA (v7.1)                      | 1.47E-03 | 14 | 84   |
| 83067          | Focal adhesion                                             | BioSystems:<br>KEGG                               | 1.88E-03 | 22 | 199  |
| 1269650        | Generic Transcription<br>Pathway                           | BioSystems:<br>REACTOME                           | 2.06E-03 | 57 | 879  |

|         |                                                     |                                          |          |    |     |
|---------|-----------------------------------------------------|------------------------------------------|----------|----|-----|
| 1268855 | Diseases of signal transduction                     | BioSystems: REACTOME                     | 2.21E-03 | 32 | 373 |
| P00047  | PDGF signaling pathway                              | PantherDB                                | 2.40E-03 | 17 | 127 |
| 83105   | Pathways in cancer                                  | BioSystems: KEGG                         | 2.70E-03 | 33 | 395 |
| 1269284 | DAP12 signaling                                     | BioSystems: REACTOME                     | 2.86E-03 | 31 | 359 |
| 83065   | Axon guidance                                       | BioSystems: KEGG                         | 3.54E-03 | 20 | 175 |
| 138073  | C-MYB transcription factor network                  | BioSystems: Pathway Interaction Database | 3.71E-03 | 13 | 78  |
| 1383076 | Regulation of TP53 Activity                         | BioSystems: REACTOME                     | 4.37E-03 | 19 | 162 |
| 137977  | Neurotrophic factor-mediated Trk receptor signaling | BioSystems: Pathway Interaction Database | 4.40E-03 | 11 | 56  |
| M19118  | Keratinocyte Differentiation                        | MSigDB C2 BIOCARTE (v7.1)                | 4.88E-03 | 10 | 46  |
| M100    | SHP2 signaling                                      | MSigDB C2 BIOCARTE (v7.1)                | 5.29E-03 | 11 | 57  |
| M13863  | MAPKinase Signaling Pathway                         | MSigDB C2 BIOCARTE (v7.1)                | 5.76E-03 | 13 | 81  |
| 137989  | FGF signaling pathway                               | BioSystems: Pathway Interaction Database | 6.01E-03 | 10 | 47  |
| 852705  | MicroRNAs in cancer                                 | BioSystems: KEGG                         | 6.06E-03 | 27 | 299 |
| 1269283 | DAP12 interactions                                  | BioSystems: REACTOME                     | 6.75E-03 | 31 | 374 |
| M7253   | Focal adhesion                                      | MSigDB C2 BIOCARTE (v7.1)                | 7.11E-03 | 21 | 199 |
| 138036  | FoxO family signaling                               | BioSystems: Pathway Interaction Database | 7.37E-03 | 10 | 48  |
| M136    | FoxO family signaling                               | MSigDB C2 BIOCARTE (v7.1)                | 8.99E-03 | 10 | 49  |
| P00018  | EGF receptor signaling pathway                      | PantherDB                                | 9.17E-03 | 15 | 111 |

## Figures

**Figure S1.** Study overview.

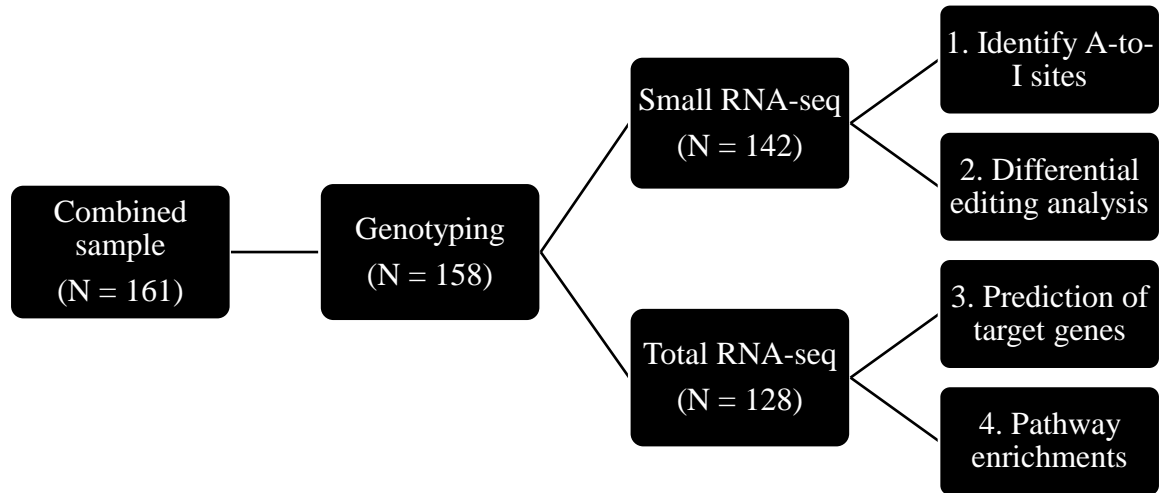



**Figure S2.** A-to-I editing of position 5 of miR-200b-3p in asthma cases and controls excluding one outlier. Associations of percentage (%) of A-to-I editing of position 5 of miR-200b-3p in bronchial epithelial cells with (A) asthma and (B) asthma severity groups based on STEP classification scores. One outlier ( $>3$  SD) was included from the control group in Figure 1 of the main text. The number of subjects is shown below risk group. Adjusted p-values are shown above the horizontal bars. The p-values for (A) and (B) were corrected for four and three tests, respectively, using a Bonferroni correction.

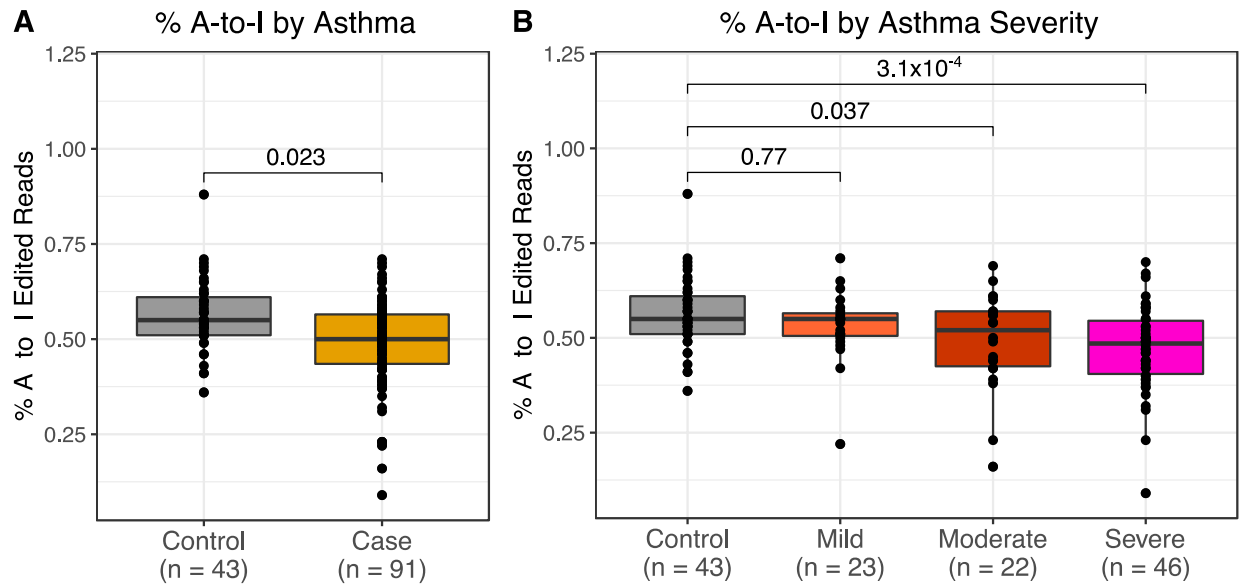

**Figure S3.** Differential expression analysis of the top four A-to-I edited sites. Comparisons of the percentage (%) of A-to-I editing at the 5<sup>th</sup> position of miR-200b-3p (top left), the 3<sup>rd</sup> position of miR-191-5p (top right), the 3<sup>rd</sup> position of miR-200b-3p (bottom left), and the 3<sup>rd</sup> position of miR-186-5p (bottom right) were made between 91 asthma cases and 44 non-asthma controls. Adjusted p-values are shown above the horizontal bars. P-values were corrected for four tests using a Bonferroni correction.

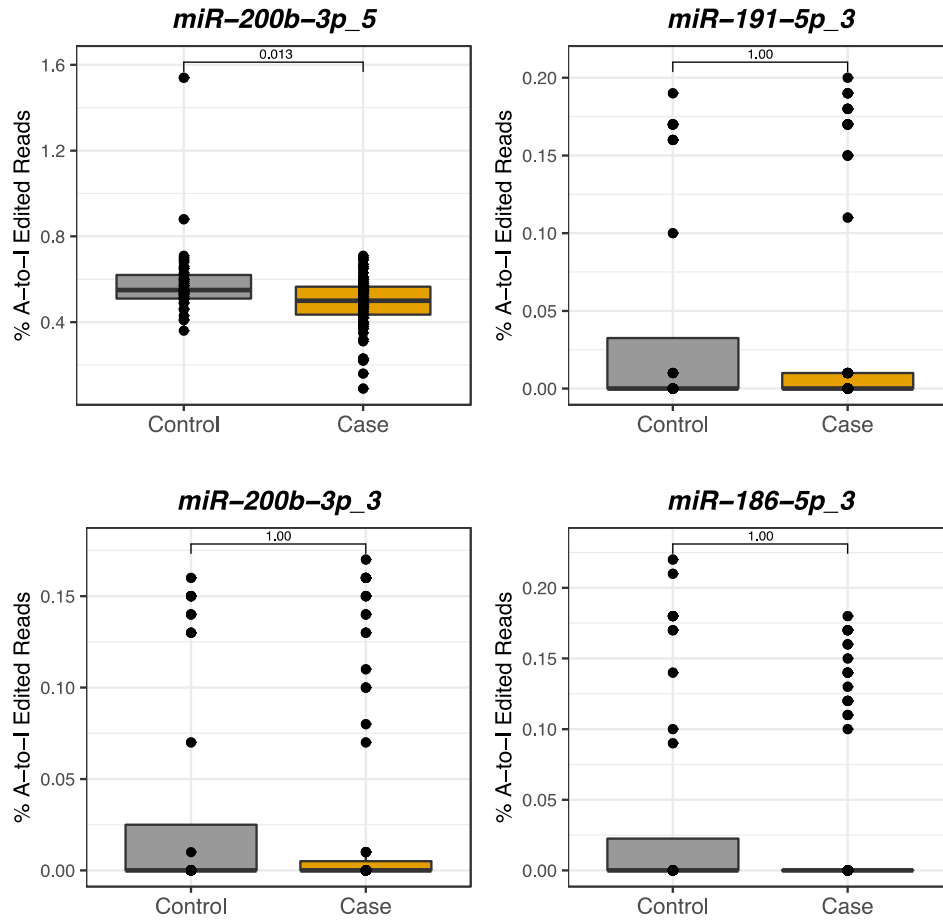

**Figure S4.** Normalized expression of ten gene targets for the two enriched pathways of the edited miR-200b-3p in 83 asthma cases and 41 controls. Gene targets that were expressed (CPM > 1) in BECs in at least 25% of the 124 subjects with RNA-seq were retained for analysis. Ten gene targets of the “IL-4 mediated signaling events” and “IFN-gamma” pathways are displayed. Adjusted p-values are shown above the horizontal bars. P-values were corrected for ten tests using a Bonferroni correction.

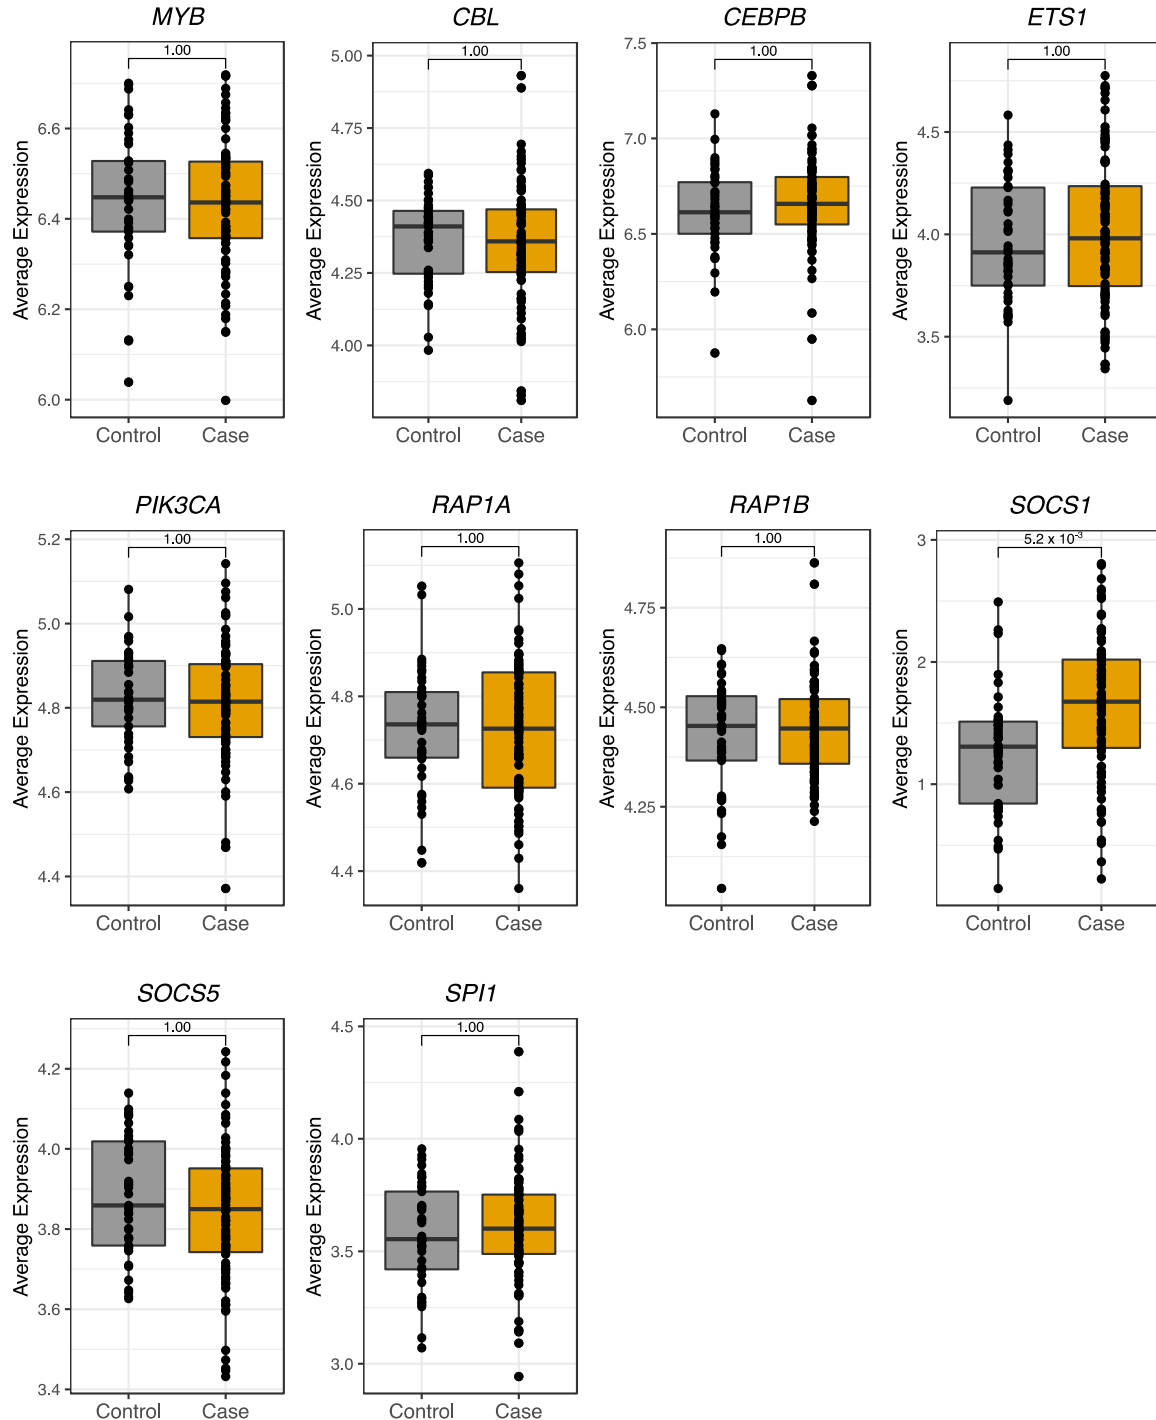

## References

1. Jun G, Flickinger M, Hetrick KN, Romm JM, Doheny KF, Abecasis GR, Boehnke M, Kang HM. Detecting and estimating contamination of human DNA samples in sequencing and array-based genotype data. *Am J Hum Genet* 2012; 91: 839-848.
2. Andrews S. FastQC: a quality control tool for high throughput sequence data. 2010. Available from: <http://www.bioinformatics.babraham.ac.uk/projects/fastqc>.
3. Lu Y, Baras AS, Halushka MK. miRge 2.0 for comprehensive analysis of microRNA sequencing data. *BMC Bioinformatics* 2018; 19: 275.
4. Dobin A, Gingeras TR. Mapping RNA-seq Reads with STAR. *Curr Protoc Bioinformatics* 2015; 51: 11.14.11-11.14.19.
5. Law CW, Chen Y, Shi W, Smyth GK. voom: Precision weights unlock linear model analysis tools for RNA-seq read counts. *Genome Biol* 2014; 15: R29.
6. Leek JT, Storey JD. Capturing heterogeneity in gene expression studies by surrogate variable analysis. *PLoS Genet* 2007; 3: 1724-1735.
7. Alon S, Mor E, Vigneault F, Church GM, Locatelli F, Galeano F, Gallo A, Shomron N, Eisenberg E. Systematic identification of edited microRNAs in the human brain. *Genome Res* 2012; 22: 1533-1540.
8. Agarwal V, Bell GW, Nam JW, Bartel DP. Predicting effective microRNA target sites in mammalian mRNAs. *Elife* 2015; 4.
9. Chen J, Bardes EE, Aronow BJ, Jegga AG. ToppGene Suite for gene list enrichment analysis and candidate gene prioritization. *Nucleic Acids Res* 2009; 37: W305-311.
